# Supplementary material for: Microwave-assisted hydrothermal synthesis of Cu/Cu2O hollow spheres with enhanced photocatalytic and gas sensing activities at room temperature
Source: Royal Society of Chemistry journal article supplement (doi:10.1039/c4dt03417a), 2015-01-01
Supplement: c4dt03417a1.pdf [file c4dt03417a1.pdf]

## Supporting Information

### Microwave-Assisted Hydrothermal Synthesis of Cu/Cu<sub>2</sub>O Hollow Spheres with Enhanced Photocatalytic and Gas Sensing Activities at Room Temperature

Xinwei Zou,<sup>ab</sup> Huiqing Fan,<sup>\*a</sup> Yuming Tian,<sup>b</sup> Mingang Zhang,<sup>b</sup> and Xiaoyan Yan<sup>b</sup>

<sup>a</sup> State Key Laboratory of Solidification Processing, School of Materials Science and Engineering, Northwestern Polytechnical University, Xi'an 710072, PR China.

<sup>b</sup> School of Materials Science and Engineering, Taiyuan University of Science and Technology, Taiyuan 030024, PR China.

#### Measurement of adsorption activity

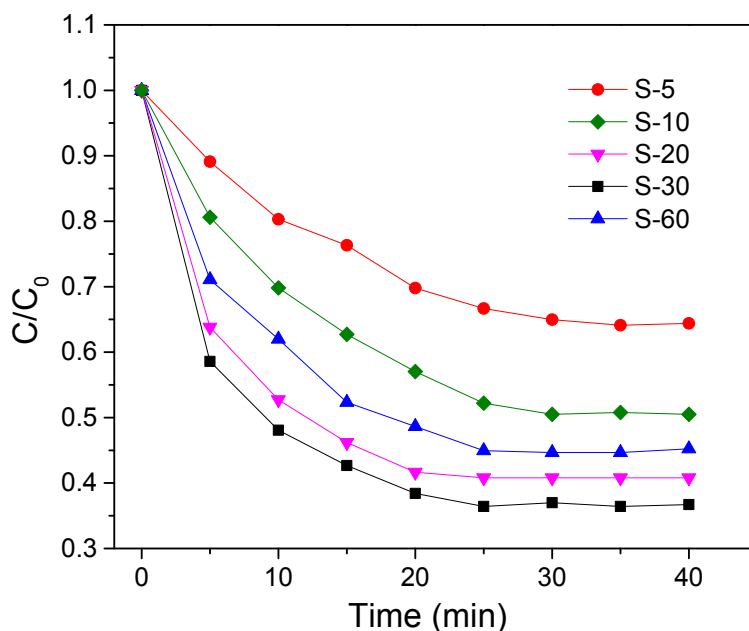

Figure S1 Adsorption ratios of different products to MO under dark.

#### Measurement of electrochemical impedance spectroscopy (EIS)

The electrochemical impedance spectroscopy (EIS) measurements were performed with an electrochemical workstation (CHI660e, Chenhua, Shanghai, China) in a frequency range from 10 mHz to 100 kHz and an AC amplitude of 5 mV at room temperature under visible light irradiation. Typically, 5 mg of as-prepared Cu-Cu<sub>2</sub>O hollow spheres composite was added to 2 mL of ethanol and then grinded for 15 min. Afterward, the viscous paste was bound onto the ITO glass via doctor-blading method, which formed the Cu-Cu<sub>2</sub>O/ITO glass working electrode and then dried at 70 °C in air for 6 h. A Pt sheet and Ag/AgCl electrode were used as counter electrode and reference electrode, respectively. Na<sub>2</sub>SO<sub>4</sub> (0.01 M) aqueous solution was employed as electrolyte.

## Measurement of hydroxyl radicals

Hydroxyl radical  $\cdot OH$  can be detected by a photoluminescence (PL) method using terephthalic acid (TA) as a probe molecule. The test procedure is similar to the photocatalytic degradation measurement, except that the aqueous MO solution is replaced with 0.4 mM TA and 2 mM NaOH. TA readily reacts with the generated  $\cdot OH$  to produce a highly fluorescent 2-hydroxy-TA ( $TA-\cdot OH$ ), which is measured by a fluorescence spectrophotometer (Hitachi F-4600, Japan) at 425 nm emission wavelength and 315 nm excitation wavelength. Fig. S2 shows fluorescence emission spectra for the different products at same irradiation time of 30 min.

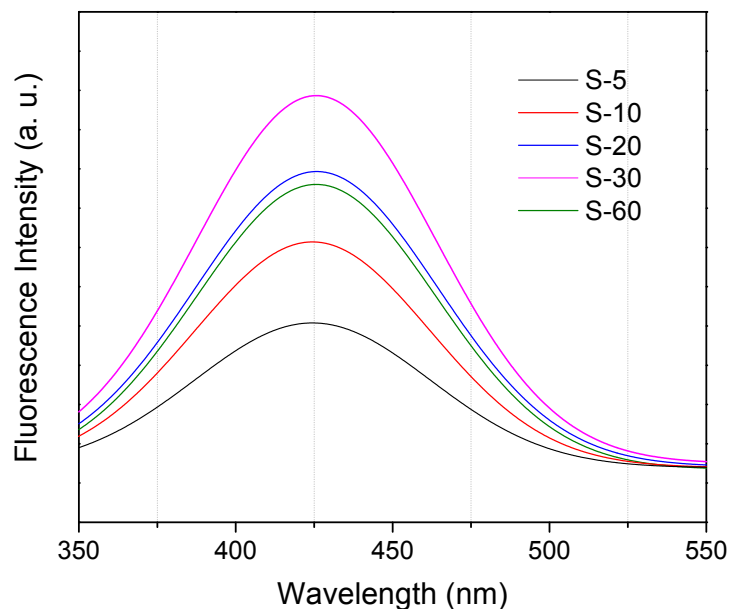

Fig. S2 Fluorescence emission spectra in the presence of different products at same irradiation time of 30 min
